# Supplementary material
Source: PubMed Central journal article supplement (PMC2629203)
Supplement: 0811353106_0811353106SI.pdf [file 0811353106_0811353106SI.pdf]

# Supporting Information

Ge et al. 10.1073/pnas.0811353106

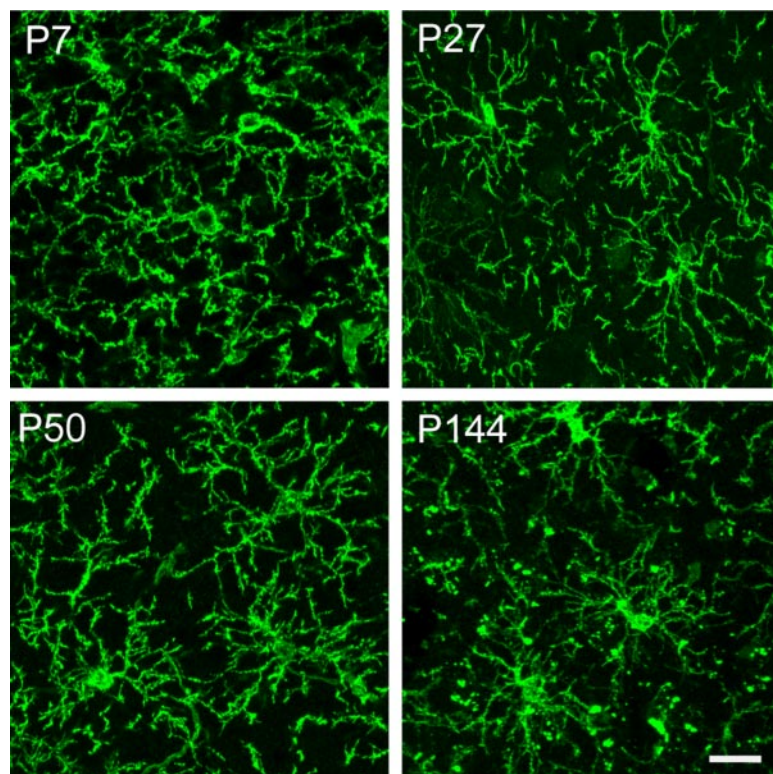

**Fig. S1.** NG2 cells with complex morphology in adult brains. Example micrograph of NG2 immunoreactivity (green) from cortex. Note multiple-process morphology at different developmental stages (P7, P27, P50, and P144). (Scale bar, 20  $\mu\text{m}$ .)

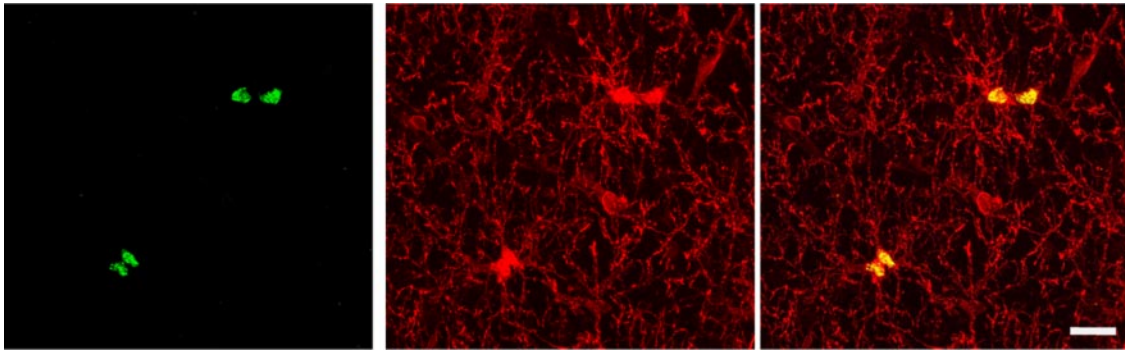

**Fig. S2.** NG2 daughter cells with complex morphology. Example micrograph of NG2 immunoreactivity (red) and BrdU<sup>+</sup> (green) from P25 cortex after 8 h of BrdU pulse-labeling. Note multiple-process morphology of all daughter cells. (Scale bar, 20  $\mu$ m.)

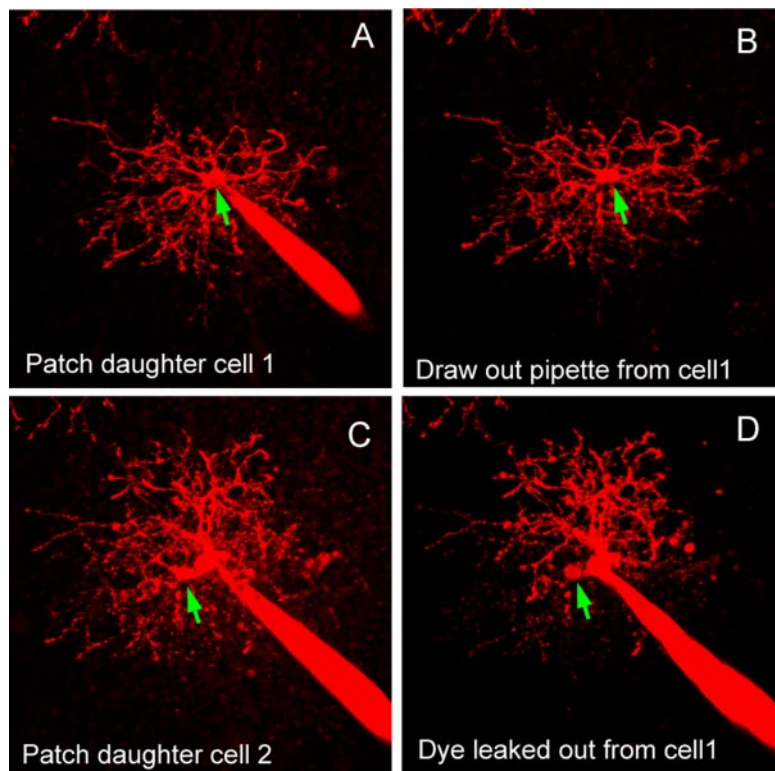

**Fig. S3.** Identification of 2 daughter cells after completion of cytokinesis. (A) Whole-cell recording of daughter cell 1. Note the dye of Alexa Fluor 568 was loaded from pipette and only one cell was labeled. (B) Dye signal of daughter cell 1 with the electrode pulled out. (C) Whole-cell recording of daughter cell 2. Pipette was loaded with the dye of Alexa Fluor 568. (D) The dye signal in cell 1 became weaker 20 min later.
